# Supplementary material for: Comparative Genomic Analysis Reveals the Potential Risk of Vibrio parahaemolyticus Isolated From Ready-To-Eat Foods in China
Source: PubMed Central journal article supplement (PMC6374323; doi:10.3389/fmicb.2019.00186), 2019-02-07
Supplement: Image_1.pdf [file Image_1.pdf]

**Supplementary Information of “Comparative Genomic Analysis Reveals the Potential Risk of *Vibrio parahaemolyticus* Isolated from Ready-to-eat Foods in China”**

**Rui Pang<sup>1</sup>, Tengfei Xie<sup>1</sup>, Qingping Wu<sup>1\*</sup>, Yanping Li<sup>1</sup>, Tao Lei<sup>1</sup>, Jumei Zhang<sup>1</sup>, Yu Ding<sup>1</sup>, Juan Wang<sup>1</sup>, Liang Xue<sup>1</sup>, Moutong Chen<sup>1</sup>, Xianhu Wei<sup>1</sup>, Youxiong Zhang<sup>1</sup>, Shuhong Zhang<sup>1</sup> and Xiaojuan Yang<sup>1</sup>.**

<sup>1</sup>State Key Laboratory of Applied Microbiology Southern China, Guangdong Provincial Key Laboratory of Microbial Culture Collection and Application, Guangdong Open Laboratory of Applied Microbiology, Guangdong Institute of Microbiology, Guangzhou 510070, China

**\* Correspondence:**

Qingping Wu  
wuqp203@163.com

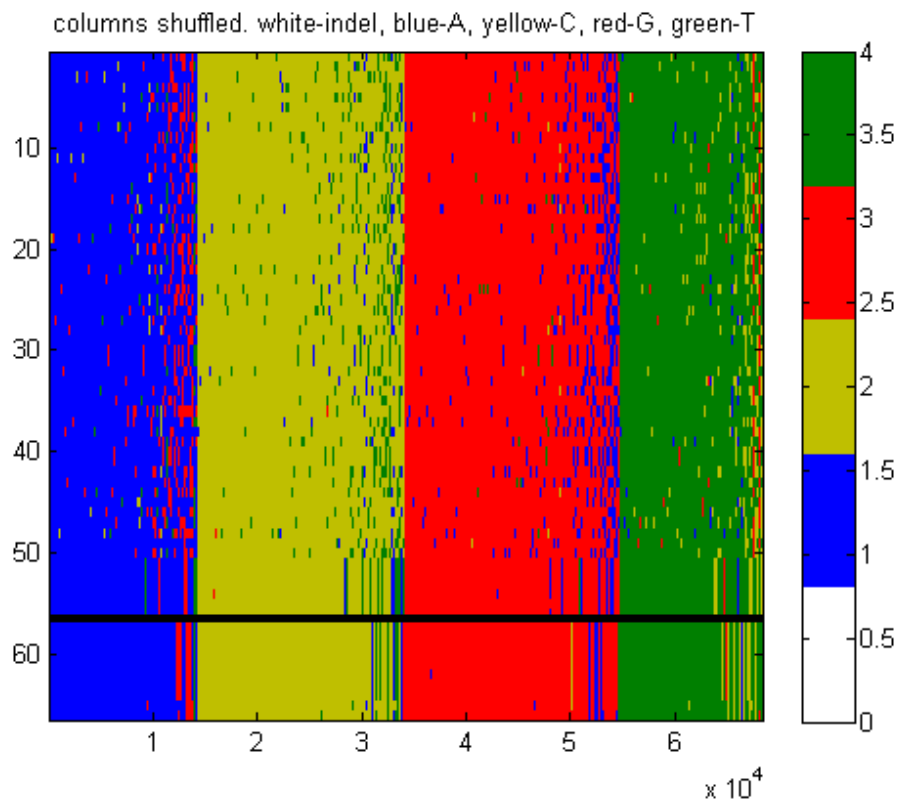

Figure S1. Bayesian Analysis of Population Structure of 66 global isolates of *Vibrio parahaemolyticus*. Each row in the figure is a strain and each column is a SNP, and horizontal black lines are drawn to separate the two clusters. The colour pattern of these SNPs within the black lines is consistent with them being assigned to the same BAPS group.

BIOFILM FORMATION - VIBRIO CHOLERAE

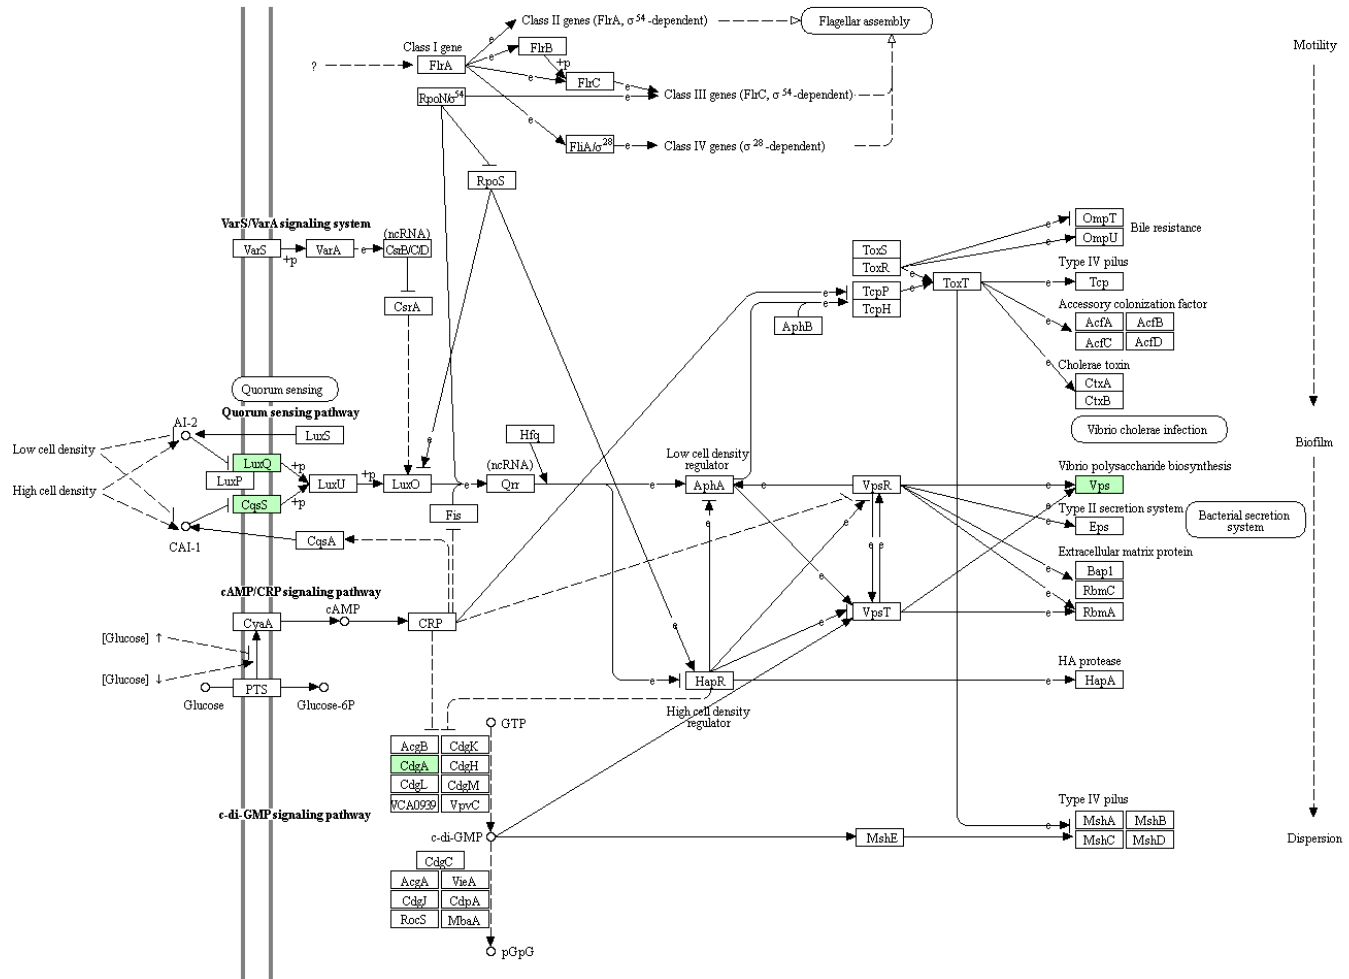

Figure S2. Pathway of biofilm formation (Ko05111). Green indicates the RTE food-related genes. LuxQ: group\_2245 (K10909); cqsS: VPA0710 (K10916); exoP: group\_261 (K16554); vpsM: group\_6406 (K20920); cdgA: group\_3579 (K20956).
